# Supplementary material
Source: publisher site journal article supplement (https://www.dovepress.com/article/393600)
Supplement: Supplementary file 1 [file get_supplementary_file.php]

Supplemental Materials

Table S1. Clinical characteristics and laboratory findings according to the severity of CAP

| Variables | Mild  (n = 83) | Severe or complicated  (n = 42) | *p* value |
| --- | --- | --- | --- |
| Boys, n (%) | 51 (61.4) | 24 (57.1) | 0.64 |
| Age, years, median (IQR) | 2.0 (1.0–3.0) | 2.5 (1.0–3.8) | 0.53 |
| Chronic conditions |  |  |  |
| Chronic airway diseases, n (%) | 4 (4.8) | 1 (2.4) | 0.66 |
| Rhinosinusitis, n (%) | 14 (16.9) | 6 (14.3) | 0.71 |
| Congenital heart defects, n (%) | 3 (3.6) | 2 (4.8) | 1.00 |
| Probable pathogen |  |  |  |
| Bacterial, n (%) | 11 (13.3) | 6 (14.3) | 0.87 |
| Viral, n (%) | 55 (66.3) | 19 (45.2) | **0.02** |
| Mycoplasma, n (%) | 22 (26.5) | 20 (47.6) | **0.02** |
| Sepsis, n (%) | 11 (13.3) | 5 (11.9) | 0.83 |
| Laboratory findings |  |  |  |
| Leukocyte counts, median (IQR), 109/L | 7.7 (5.7–10.0) | 7.3 (6.0–10.4) | 0.66 |
| Neutrophil percentage, median (IQR), % | 42.4 (28.1–55.2) | 46.2 (30.3–63.8) | 0.25 |
| Neutrophil counts, median (IQR), 109/L | 3.0 (1.8–5.1) | 3.3 (2.1–6.1) | 0.33 |
| Lymphocyte percentage, median (IQR), % | 44.9 (32.6–59.9) | 39.5 (25.3–54.8) | 0.10 |
| Lymphocyte counts, median (IQR), 109/L | 3.2 (2.3–4.3) | 2.7 (1.8–4.5) | 0.13 |
| Platelet, median (IQR), 109/L | 302.0 (241.5–390.5) | 314.0 (242.0–391.0) | 0.95 |
| HBP, median (IQR), ng/ml | 24.3 (14.8–46.5) | 43.0 (18.9–104.0) | **0.03** |
| CRP, median (IQR), mg/dL | 5.0 (0.0–17.0) | 5.5 (1.2–21.0) | 0.44 |
| Procalcitonin, median (IQR), ng/mL | 0.1 (0.1–0.5) | 0.1 (0.1–0.4) | 0.73 |
| ESR, median (IQR), mm/h | 18.0 (7.0–38.2) | 26.5 (13.0–44.0) | 0.08 |
| Ferritin, median (IQR), ng/mL | 76.8 (46.5–117.0) | 85.2 (39.9–135.8) | 0.40 |
| LDH, median (IQR), U/L | 305.5 (268.8–344.0) | 326.0 (299.5–370.0) | 0.09 |
| SAA, median (IQR), mg/L | 28.6 (4.8–119.6) | 40.0 (5.9–113.4) | 0.83 |
| Lactate, median (IQR), mmol/L | 2.4 (1.9–3.2) | 2.5 (2.0–3.1) | 0.91 |
| Interleukin-1β, median (IQR), ng/L | 6.1 (5.0–10.7) | 8.7 (5.0–18.0) | 0.30 |
| Interleukin-2, median (IQR), U/mL | 1121 (798–1570) | 988 (676–1383) | 0.36 |
| Interleukin-6, median (IQR), ng/L | 5.9 (2.8–13.5) | 6.6 (4.2–16.8) | 0.29 |
| Interleukin-8, median (IQR), ng/L | 22.6 (13.2–63.9) | 24.9 (12.2–66.6) | 0.82 |
| Interleukin-10, median (IQR), ng/L | 5.2 (5.0–8.9) | 5.0 (5.0–10.9) | 0.91 |
| TNF-α, median (IQR), ng/L | 14.1 (11.9–19.2) | 14.8 (12.7–20.2) | 0.63 |

Abbreviations: CAP, community-acquired pneumonia; CRP, C-reaction protein; ESR, erythrocyte sedimentation rate; HBP, heparin-binding protein; IQR, interquartile range; LDH, lactate dehydrogenase; SAA, serum amyloid A; TNF-α, tumor necrosis factor-α;

Significant *p*-values are bolded.

Table S2. The area under the ROC curve for candidate biomarkers for severe or complicated CAP.

| Variables | Area under the ROC Curve | |
| --- | --- | --- |
| All Patients (95% CI) | Non-bacterial infection patients only (95% CI) |
| Leukocyte counts | 0.48 (0.37, 0.58) | 0.51 (0.39, 0.62) |
| Neutrophil counts | 0.55 (0.44, 0.66) | 0.54 (0.43, 0.66) |
| Platelet | 0.50 (0.39, 0.62) | 0.53 (0.41, 0.65) |
| HBP | 0.62 (0.51, 0.74) | 0.67 (0.55, 0.78) |
| CRP | 0.54 (0.44, 0.65) | 0.55 (0.44, 0.67) |
| Procalcitonin | 0.48 (0.38, 0.59) | 0.50 (0.39, 0.62) |
| ESR | 0.60 (0.49, 0.71) | 0.59 (0.48, 0.71) |
| Ferritin | 0.55 (0.42, 0.68) | 0.52 (0.39, 0.65) |
| LDH | 0.60 (0.49, 0.72) | 0.61 (0.49, 0.73) |
| SAA | 0.51 (0.40, 0.63) | 0.53 (0.41, 0.65) |
| Lactate | 0.51 (0.39, 0.63) | 0.51 (0.38, 0.63) |
| Interleukin-1β | 0.56 (0.44, 0.68) | 0.54 (0.42, 0.66) |
| Interleukin-2 | 0.55 (0.44, 0.67) | 0.56 (0.44, 0.68) |
| Interleukin-6 | 0.56 (0.45, 0.68) | 0.48 (0.36, 0.60) |
| Interleukin-8 | 0.49 (0.37, 0.60) | 0.54 (0.42, 0.67) |
| Interleukin-10 | 0.51 (0.39, 0.62) | 0.51 (0.40, 0.63) |
| Tumor necrosis factor-α | 0.53 (0.41, 0.64) | 0.50 (0.39, 0.63) |

Abbreviations: CAP, community-acquired pneumonia; CRP, C-reaction protein; ESR, erythrocyte sedimentation rate; HBP, heparin-binding protein; LDH, lactate dehydrogenase; ROC, receiver operator characteristic; SAA, serum amyloid A; 95% CI, 95% confidence interval.

Table S3. Association between HBP and the severity of illness in CAP excluding patients with bacterial infections.

| Outcomes | HBP  concentration | Patients  at risk (%) | Crude OR  (95% CI) | Adjusted OR a  (95% CI) |
| --- | --- | --- | --- | --- |
| Any severe radiographic finding | Q1–Q3 group | 13/80 (16.3) | ref | ref |
| Q4 group | 13/28 (46.4) | 4.47 (1.73, 11.56) * | 3.03 (0.85, 10.82) |
| Per 10 ng/ml increase | / | 1.13 (1.04, 1.24) * | 1.10 (0.99, 1.23) |
| Any systemic manifestation | Q1–Q3 group | 5/80 (6.3) | ref | ref |
| Q4 group | 5/28 (17.9) | 3.26 (0.87, 12.26) | 4.36 (0.84, 22.50) |
| Per 10ng/ml increase | / | 1.14 (1.02, 1.27) * | 1.13 (0.99, 1.30) |
| Severe or complicated pneumonia | Q1–Q3 group | 19/80 (23.8) | ref | ref |
| Q4 group | 17/28 (60.7) | 4.96 (1.98, 12.41) * | 3.86 (1.20, 12.43) * |
| Per 10 ng/ml increase | / | 1.17 (1.06, 1.28) * | 1.14 (1.02, 1.27) * |
| Length of hospitalization ≥ 10 days | Q1–Q3 group | 5/80 (6.3) | ref | ref |
| Q4 group | 8/28 (28.6) | 6.00 (1.77, 20.35) * | 2.32 (0.41, 13.10) |
| Per 10 ng/ml increase | / | 1.13 (1.02, 1.25) * | 1.09 (0.94, 1.27) |

a Values are ORs (95% CIs) for logistic regression model, adjusting for age, sex, and pathogen.

*p < 0.05

Abbreviations: CAP, community-acquired pneumonia; HBP, heparin-binding protein; OR, odds radio; 95% CI, 95% confidence interval.
